# Supplementary material for: Cryo-EM structures of the SARS-CoV-2 endoribonuclease Nsp15 reveal insight into nuclease specificity and dynamics
Source: PubMed Central journal article supplement (PMC7840905; doi:10.1038/s41467-020-20608-z), 2021-01-27
Supplement: 41467_2020_20608_MOESM3_ESM.pdf [file 41467_2020_20608_MOESM3_ESM.pdf]

## **Description of Additional Supplementary Files**

**Supplementary Movie 1.** Cryo-EM reconstruction of nucleotide bound Nsp15

**Supplementary Movie 2.** 3D Variability of Apo-H235A-Nsp15 dataset i

**Supplementary Movie 3.** 3D Variability of Apo-wt-Nsp15

**Supplementary Movie 4.** 3D Variability of Apo-H235A-Nsp15 dataset ii
